# Supplementary material for: Relationship between the Relative Limitation and Resorption Efficiency of Nitrogen vs Phosphorus in Woody Plants
Source: PLOS journal article supplement (doi:10.1371/journal.pone.0083366), 2013-12-23
Supplement: S3 (10.1371/journal.pone.0083366.s003) [file journal.pone.0083366.s003]

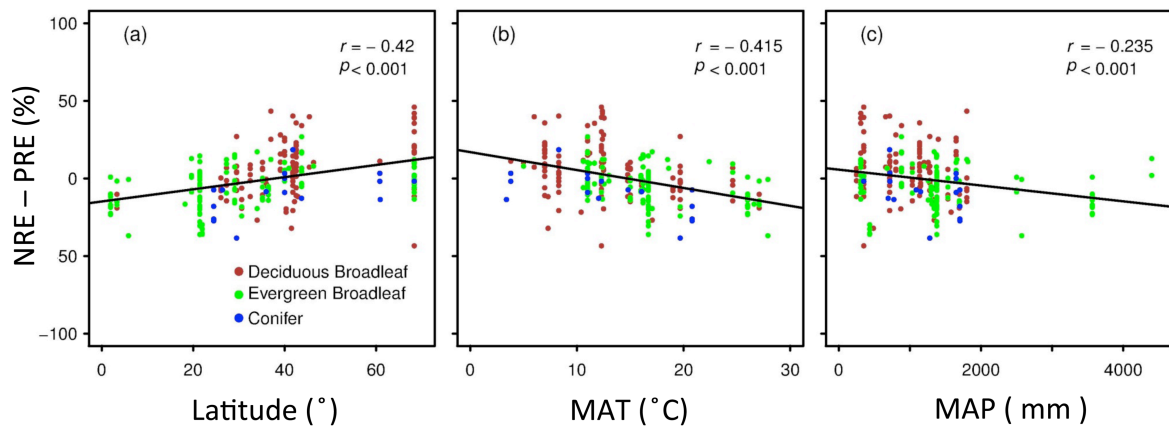

**Figure S2. The relationship between relative resorption efficiency (NRE - PRE) and (a) the absolute latitude ( $^{\circ}$ ), (b) mean annual temperature (MAT,  $^{\circ}\text{C}$ ) and (c) mean annual precipitation (MAP, mm). All the lines were fitted with ordinary least square linear regression.**
